# Supplementary material for: Differentiation of Human Embryonic Stem Cells to Sympathetic Neurons: A Potential Model for Understanding Neuroblastoma Pathogenesis
Source: Hindawi journal article supplement (doi:10.1155/2018/4391641), 2018-11-01

Supplementary Figure 1

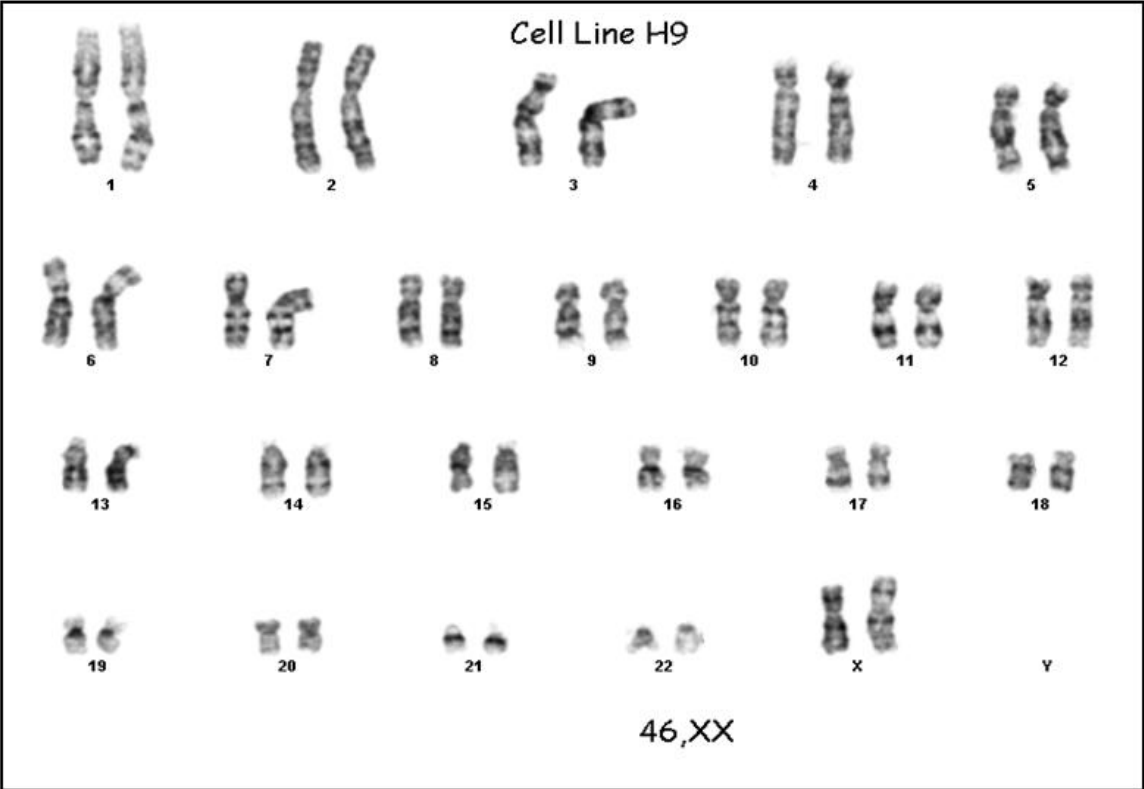

Supplement: f1 [file 4391641.f1.pdf]
